# Supplementary material for: Ablative Tumor Radiation Can Change the Tumor Immune Cell Microenvironment to Induce Durable Complete Remissions
Source: Oxford University Press journal article supplement (doi:10.1158/1078-0432.ccr-14-2824), 2015-04-13
Supplement: 10780432ccr142824-sup-139185_2_supp_2887564_nkpswf.doc [file 10780432ccr142824-sup-139185_2_supp_2887564_nkpswf.doc]

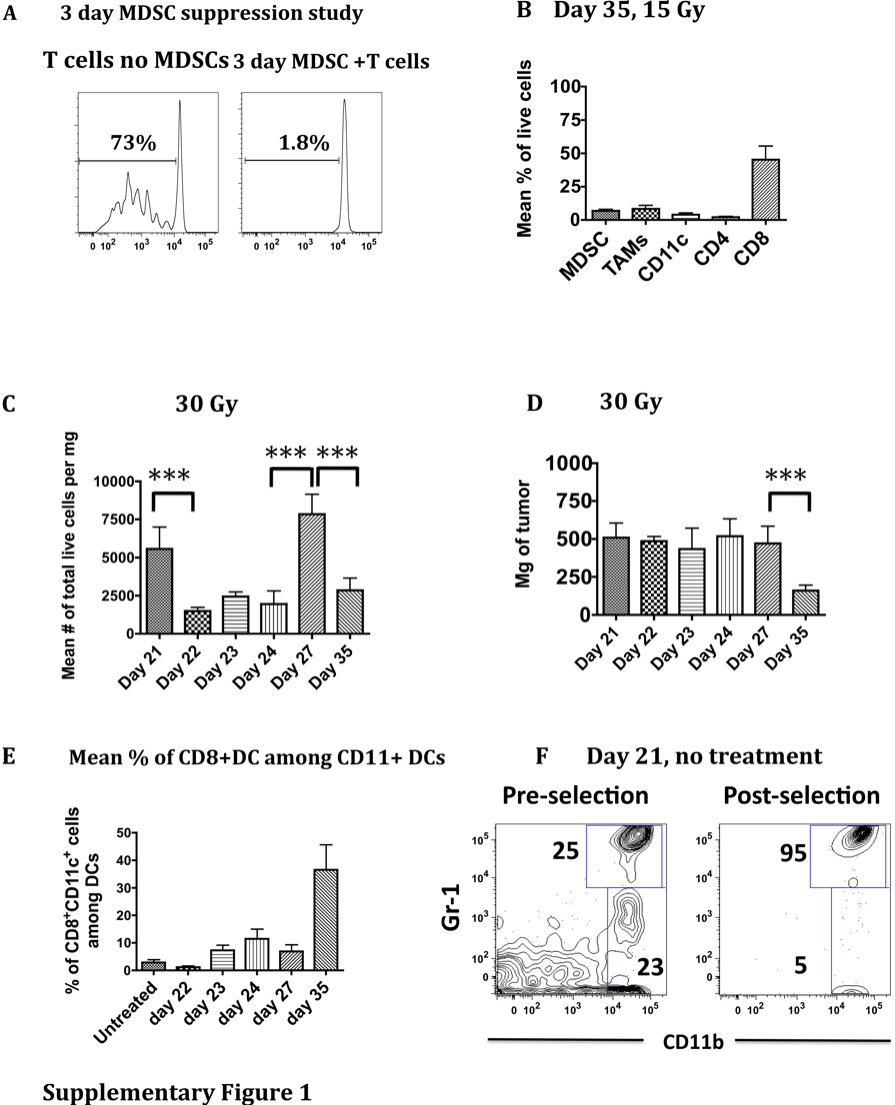


Supplementary Figure 1. **In vitro suppressive function of tumor-infiltrating MDSC 3 days after LTI, and analysis of CD8+CD11+ dendritic cell tumor infiltration after LTI.**

**A,** Representative staining of cultures in which CT26 tumor-derived MDSCs collected 3 days after 30 Gy LTI were incubated with syngeneic splenic T cells loaded with CFSE and incubated with CD3/CD28 beads in vitro for 5 days. MDSC:Tcell ratio was 1:1. Percentage of gated CD8+ T cells that diluted CFSE is shown. **B**, Cell subsets (CD11b Gr-1hi, CD11b Gr-1lo, CD11c, CD4+ and CD8+) are shown as a mean percentage among live mononuclear cells +/- SE after LTI 15 Gy (n=5). **C**, Kinetics of total live tumor-infiltrating cells after 30 Gy LTI was analyzed at days 1,2,3, 6 and 14 after LTI that are days 22, 23, 24, 27, and 35 after tumor induction, respectively (n=5 each group). Total live cells are shown as a mean number +/- SE per mg of tumor. **D**, Kinetics of tumor weight changes after 30 Gy are shown as mean weight in mgs +/- SE (n=5 each group). **E**, Percentage of CT26 tumor-infiltrating CD8+ CD11c+ cells is shown as a mean percentage +/- SE among total CD11c+ cells at days 22, 23, 24, 27 and 35 after tumor inoculation (n=5 each group). 30Gy LTI was given at day 21. **F**, Representative flow cytometry profiles of tumor cells from day 21 untreated CT26 tumors stained with anti-Gr-1 mAbs, incubated with streptavidin microbeads, and purified with magnetic columns. Percentages of Gr-1hi CD11b+

Supplementary Figure 2. **PDL-1 and CD62L expression of tumor-infiltrating cells.**

Tumor-infiltrating cells were analyzed at day 21 after CT26 tumor implantation, as well as at day 35 in untreated animals or animals that received LTI 30 Gy at day 21.

PDL-1 expression was analyzed on MDSCs (gated Mac-1+ Gr1hi), TAMs (gated Mac-1+ Gr1lo) as well as on DCs (CD11c+). CD44 and CD62L expression was analyzed on CD8+ tumor infiltrating T cells. The percentage of effector memory cells (CD62L-CD44+) are shown in the lower boxes. Representative stainings are shown.

**Supplementary Figure 3**

Supplementary Figure 3.

CT26 luc+ tumors were established in BALB/c RAG2-/- animals. 30 Gy LTI was given on day 21 after tumor induction. Bioluminescence imaging (BLI) is shown. with proton emission at serial time points.


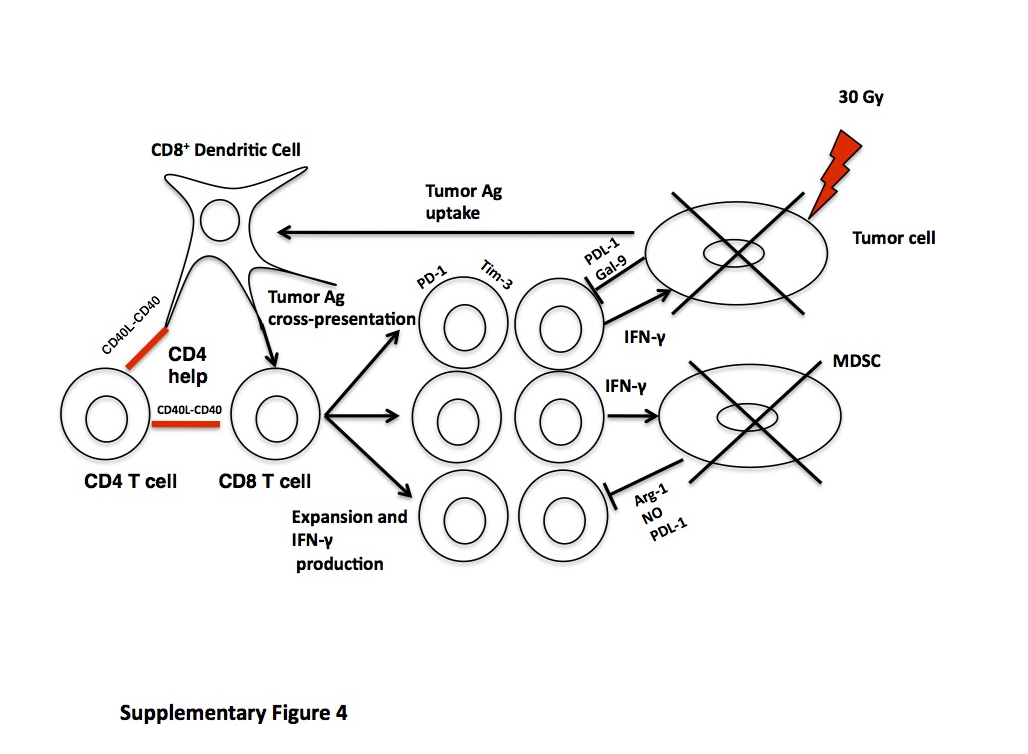


Supplementary Figure 4. **Model for T cell mediated remissions and reversal of the immunosuppressive tumor microenvironment**

High dose LTI results in tumor cell death, release of tumor antigens, and innate immune activation of CD8+ dendritic cells (DCs). CD8+DCs present tumor antigen to CD8+ T cells. CD4+ T cells are also stimulated by tumor antigen and provide help to the CD8+ T cells via CD40L. The CD8+ T cells eliminate both tumor cells and the MDSCs in the stroma in an IFN- dependent manner. Tumor cell expression of PDL-1 and Gal-9, inhibits CD8+ T cell function by binding to the PD-1 and Tim-3 receptors, and MDSCs mediate their inhibitory effects by expression of Arg-1, NO, and PDL-1.
